# Supplementary material
Source: Elsevier journal article supplement (https://www.sciencedirect.com/science/article/pii/S0211139X17300070)
Supplement: mmc1 [file S0211139X17300070:mmc1.pdf]

## ANEXO 1. VERSIÓN ACORTADA DE LA ESCALA DE EFICACIA EN CAÍDAS (Short FES-I)

**Instrucciones:** Ahora nos gustaría hacerle unas preguntas en relación a cuan preocupada/o está usted de la posibilidad de caerse. Para cada una de las siguientes actividades, por favor haga una cruz en la frase que más se aproxime a su opinión que muestre la medida en que está preocupado/a que pueda caerse si hiciera esta actividad. Por favor conteste pensando en la manera habitual que tiene de realizar la actividad. Si Ud. no realiza actualmente actividad (ej., si alguien compra por usted), por favor conteste en relación a mostrar si usted estaría preocupado/a de caerse SI usted realizará dicha actividad

| USTED ESTÁ PREOCUPADO QUE PUEDA CAERSE AL:                                        | En absoluto preocupado/a   | Algo preocupado/a          | Bastante preocupado/a      | Muy preocupado/a           |
|-----------------------------------------------------------------------------------|----------------------------|----------------------------|----------------------------|----------------------------|
| 1. Vestirse o desvestirse                                                         | 1 <input type="checkbox"/> | 2 <input type="checkbox"/> | 3 <input type="checkbox"/> | 4 <input type="checkbox"/> |
| 2. Bañarse o ducharse                                                             | 1 <input type="checkbox"/> | 2 <input type="checkbox"/> | 3 <input type="checkbox"/> | 4 <input type="checkbox"/> |
| 3. Sentarse o levantarse de una silla                                             | 1 <input type="checkbox"/> | 2 <input type="checkbox"/> | 3 <input type="checkbox"/> | 4 <input type="checkbox"/> |
| 4. Subir o bajar escaleras                                                        | 1 <input type="checkbox"/> | 2 <input type="checkbox"/> | 3 <input type="checkbox"/> | 4 <input type="checkbox"/> |
| 5. Tomar algo que está en altura (por encima de su cabeza) o que está en el suelo | 1 <input type="checkbox"/> | 2 <input type="checkbox"/> | 3 <input type="checkbox"/> | 4 <input type="checkbox"/> |
| 6. Subir y bajar superficies inclinadas (por ejemplo, una rampa)                  | 1 <input type="checkbox"/> | 2 <input type="checkbox"/> | 3 <input type="checkbox"/> | 4 <input type="checkbox"/> |
| 7. Salir a un evento social (ej. religioso, reunión familiar, reunión social)     | 1 <input type="checkbox"/> | 2 <input type="checkbox"/> | 3 <input type="checkbox"/> | 4 <input type="checkbox"/> |
| <b>PUNTAJES:</b>                                                                  | Sumar todos los 1          | Sumar todos los 2          | Sumar todos los 3          | Sumar todos los 4          |
| <b>PUNTAJE TOTAL</b>                                                              |                            |                            |                            |                            |

| RESULTADO                                                                                                                                         |
|---------------------------------------------------------------------------------------------------------------------------------------------------|
| 7 – 8: preocupación baja; 9 – 13: preocupación moderada; 14 – 28: preocupación alta<br><b>Mínima puntuación: 7 / Máxima puntuación: 28 puntos</b> |
